# Supplementary material for: The Effects of Amphiregulin Induced MMP-13 Production in Human Osteoarthritis Synovial Fibroblast
Source: Hindawi journal article supplement (doi:10.1155/2014/759028), 2014-01-01

Fig. S1

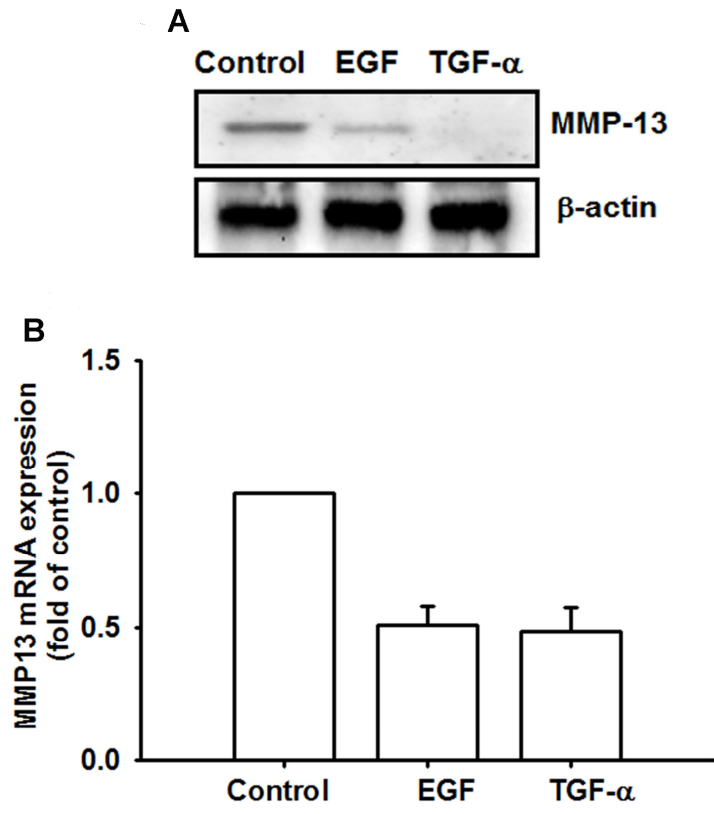

Fig. S2

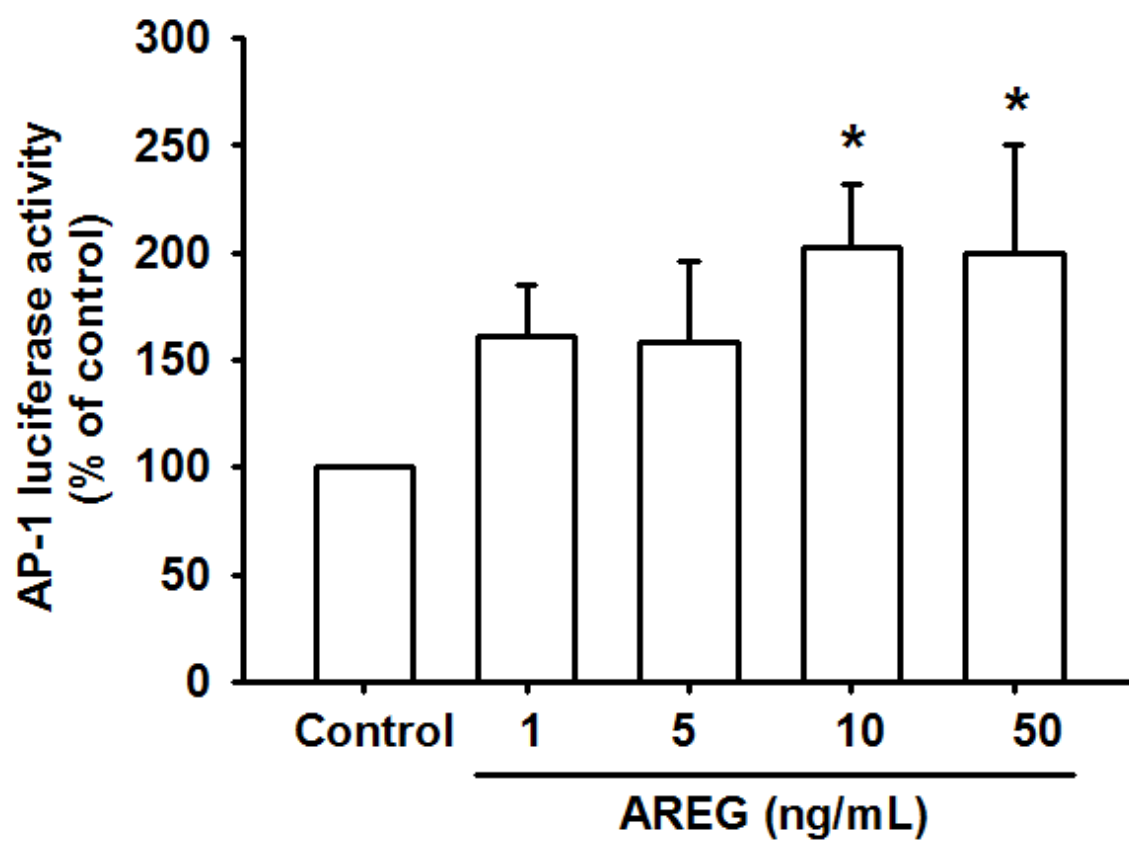

Supplement: f1 [file 759028.f1.pdf]
